# Supplementary material for: The structure and magnetism of mono- and di-nuclear Ni(ii) complexes derived from {N3O}-donor Schiff base ligands
Source: Royal Society of Chemistry journal article supplement (doi:10.1039/c7nj00158d), 2017-01-01
Supplement: c7nj00158d1.pdf [file c7nj00158d1.pdf]

## Electronic Supplementary information

### Structure and magnetism of mono- and di-nuclear Ni(II) complexes derived from {N<sub>3</sub>O}-donor Schiff base ligand

Anangamohan Panja,<sup>\*a</sup> Narayan Ch. Jana,<sup>a</sup> Sarmistha Adak,<sup>a</sup> Paula Brandão,<sup>b</sup> Lubor Dlháň,<sup>c</sup> Ján Titiš,<sup>d</sup> Roman Boča<sup>d</sup>

<sup>a</sup> Postgraduate Department of Chemistry, Panskura Banamali College, Panskura RS, WB 721152, India

<sup>b</sup> Department of Chemistry, CICECO-Aveiro Institute of Materials, University of Aveiro, 3810-193 Aveiro, Portugal

<sup>c</sup> Institute of Inorganic Chemistry, FCHPT, Slovak University of Technology, 812 37 Bratislava, Slovakia

<sup>d</sup> Department of Chemistry, Faculty of Natural Sciences, University of SS Cyril and Methodius, 91701 Trnava, Slovakia

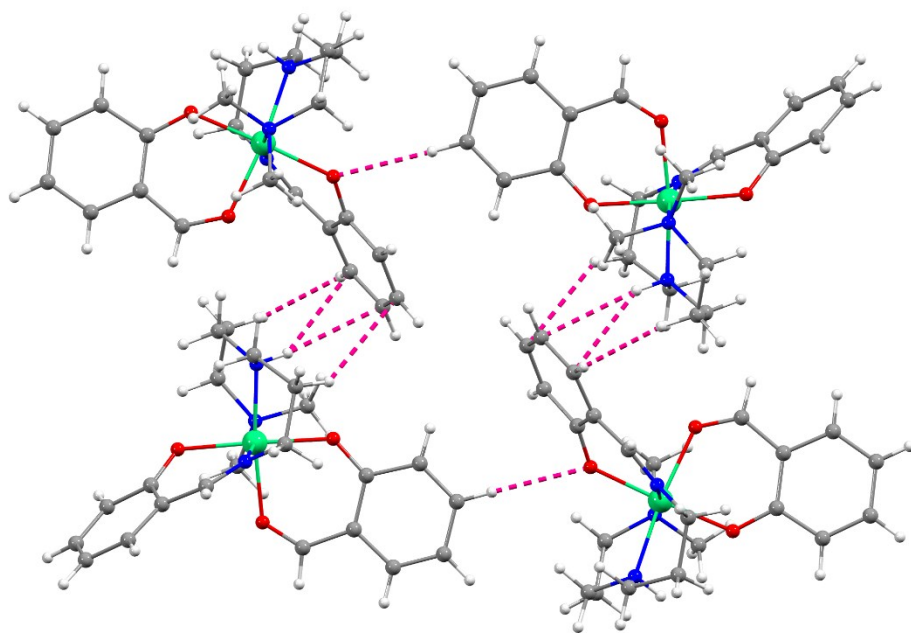

Fig. S1. Packing diagram of **2** showing different noncovalent interactions.

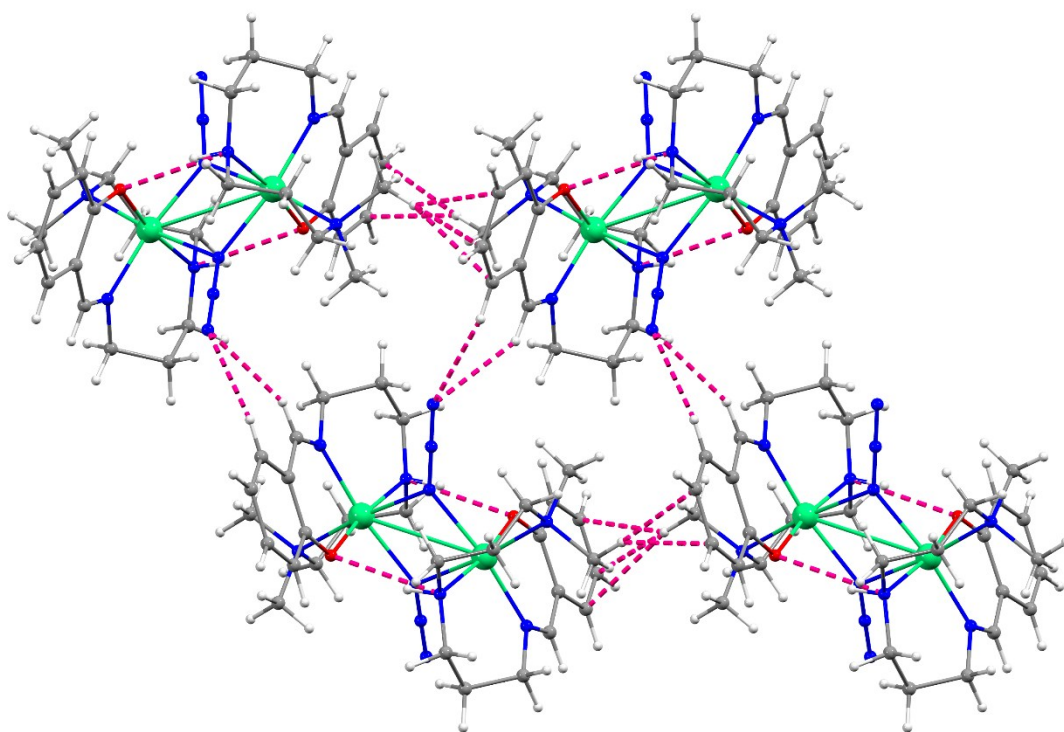

Fig. S2. Packing diagram of **3** showing different noncovalent interactions.
